# Supplementary material
Source: MDPI journal article supplement (https://www.mdpi.com/2311-5637/8/7/299)
Supplement: s1 [file s1]

Table S1 The eleven single base mutations in the genome of strain 4WGX

| Position | Sequence change | Gene        | Protein change | Protein function                                                                           | Ref  |
|----------|-----------------|-------------|----------------|--------------------------------------------------------------------------------------------|------|
| 199908   | C→T             | <i>bamA</i> | R661C          | outer membrane protein assembly factor BamA                                                | [1]  |
| 419625   | G→T             | <i>brnQ</i> | V271F          | branched chain amino acid transporter BrnQ                                                 | [2]  |
| 547694   | A→G             | <i>fdrA</i> | E38E           | putative oxamate carbamoyltransferase FdrA                                                 | [3]  |
| 556858   | A→T             | <i>ybcJ</i> | L36Q           | putative RNA-binding protein YbcJ                                                          | [4]  |
| 624402   | C→T             | <i>fepB</i> | R99C           | ferric enterobactin ABC transporter periplasmic binding protein                            | [5]  |
| 1065700  | C→T             | <i>agp</i>  | R415C          | glucose-1-phosphatase                                                                      | [6]  |
| 1093686  | T→C             | <i>dgcT</i> | V130A          | putative diguanylate cyclase DgcT                                                          | [7]  |
| 1303712  | A→G             | <i>oppB</i> | S273G          | murein tripeptide ABC transporter/oligopeptide ABC transporter inner membrane subunit OppB | [8]  |
| 2019202  | C→T             | <i>fliK</i> | T171I          | flagellar hook-length control protein                                                      | [9]  |
| 2866111  | A→G             | <i>ygbN</i> |                | putative transporter YgbN                                                                  | [10] |
| 2906975  | C→G             | <i>eno</i>  | D450H          | enolase                                                                                    | [11] |

## References

1. Doyle, M.T.; Bernstein, H.D. BamA forms a translocation channel for polypeptide export across the bacterial outer membrane. *Mol. Cell.* **2021**,81,2000-2012.
2. Dutta, S.; Corsi, I.D.; Bier, N.; Koehler, T.M. BrnQ-type branched-chain amino acid transporters influence *Bacillus anthracis* growth and virulence. *mBio.* **2022**,25, e0364021.
3. Kim, N.Y.; Lee, Y.J.; Park, J.W.; Kim, S.N.; Kim, E.Y.; Kim, Y.; Kim, O.B. An *Escherichia coli* FdrA Variant Derived from Syntrophic Coculture with a Methanogen Increases Succinate Production Due to Changes in Allantoin Degradation. *mSphere.* **2021**,6,e0065421.
4. Volpon, L.; Lievre, C.; Osborne, M.J.; Gandhi, S.; Iannuzzi, P.; Larocque, R.; Cygler, M.; Gehring, K.; Ekiel, I. The solution structure of YbcJ from *Escherichia coli* reveals a recently discovered *alphal* motif involved in RNA binding. *J. Bacteriol.*

**2003**,185,4204-4210.

5. Chu, B.C.; Otten, R.; Krewulak, K.D.; Mulder, F.A.; Vogel, H.J. The solution structure, binding properties, and dynamics of the bacterial siderophore-binding protein FepB. *J. Biol. Chem.* **2014**,289,29219-29234.

6. Lee, D.C.; Cottrill, M.A.; Forsberg, C.W.; Jia, Z. Functional insights revealed by the crystal structures of *Escherichia coli* glucose-1-phosphatase. *J. Biol. Chem.* **2003**,278,31412-31418.

7. Tagliabue, L.; Antoniani, D.; Maciąg, A.; Bocci, P.; Raffaelli, N.; Landini, P. The diguanylate cyclase YddV controls production of the exopolysaccharide poly-N-acetylglucosamine (PNAG) through regulation of the PNAG biosynthetic *pgaABCD* operon. *Microbiology.* **2010**,156,2901-2911.

8. Masulis, I.S.; Sukharycheva, N.A.; Kiselev, S.S.; Andreeva, Z.S.; Ozoline, O.N. Between computational predictions and high-throughput transcriptional profiling: in depth expression analysis of the OppB trans-membrane subunit of *Escherichia coli* OppABCDF oligopeptide transporter. *Res. Microbiol.* **2020**,171,55-63.

9. Minamino, T.; Inoue, Y.; Kinoshita, M.; Namba, K. FliK-Driven Conformational Rearrangements of FlhA and FlhB Are Required for Export Switching of the Flagellar Protein Export Apparatus. *J. Bacteriol.* **2020**,202, e00637-19.

10. Lolkema, J.S. Domain structure and pore loops in the 2-hydroxycarboxylate transporter family. *J. Mol. Microbiol. Biotechnol.* **2006**,11,318-325.

11. Poyner, R.R.; Larsen, T.M.; Wong, S.W.; Reed, G.H. Functional and structural changes due to a serine to alanine mutation in the active-site flap of enolase. *Arch.*

Biochem. Biophys. **2002**,401,155-163.
